# Supplementary material for: Human Immunodeficiency Virus (HIV) Knowledge and Stigma Among Medical Students in Egypt: A National Cross-Sectional Study
Source: Research Square preprint supplement (doi:10.21203/rs.3.rs-7991652/v1), 2026-02-11
Supplement: Supplementary file 1 [file 5821bb50a16881aa162f843f.docx]

**Supplementary Table 1. Perceived Adequacy of HIV/AIDS Curriculum Coverage Among Medical Students in Egypt (n = 1098 reported studying HIV in curricula)**

| **Curriculum Aspect** | **Adequately Covered [n (%)]** | **Somewhat Covered [n (%)]** | **Inadequately Covered [n (%)]** |
| --- | --- | --- | --- |
| **Scientific Foundations** |  |  |  |
| Modes of Transmission | 596 (55.2%) | 398 (36.9%) | 85 (7.9%) |
| Basic Science (Virology, Immunology) | 584 (54.1%) | 405 (37.5%) | 90 (8.3%) |
| **Clinical Practice** |  |  |  |
| Diagnosis and Testing | 470 (43.6%) | 421 (39.0%) | 188 (17.4%) |
| Treatment and Management | 410 (38.0%) | 423 (39.2%) | 246 (22.8%) |
| **Psychosocial and Ethical Aspects** |  |  |  |
| Social and Public Health Impact | 260 (24.1%) | 384 (35.6%) | 435 (40.3%) |
| Rights and Confidentiality of PLHIV | 218 (20.2%) | 331 (30.7%) | 530 (49.1%) |
| Stigma and Discrimination | 211 (19.6%) | 340 (31.5%) | 528 (48.9%) |
| Patient Communication and Counseling | 209 (19.4%) | 386 (35.8%) | 484 (44.9%) |
| Stereotyping and Bias | 209 (19.4%) | 330 (30.6%) | 540 (50.0%) |
